# Supplementary material for: RNA-Sequencing Characterization of lncRNA and mRNA Functions in Septic Pig Liver Injury
Source: MDPI journal article supplement (doi:10.3390/genes14040945), 2023-04-20
Supplement: s1 [file s1]

**Table S1.** Primer sequences used in qRT-PCR and SMARTer RACE.

| Gene                                 | Sequence (5'-3')                                       |
|--------------------------------------|--------------------------------------------------------|
| LNC_001557                           | F:GAGGCTCGGGAGTCGTTT<br>R:CATTACATAACCCGCTGGC          |
| LNC_003205                           | F:AGTGGACCCAGAAAGACAGTAGT<br>R:GTGAGACATGGAATTGGAGAGAT |
| LNC_002154                           | F:CTAAGACAGCCGTCCATCCA<br>R:GGTTCAAGCCTCAACAGTTCC      |
| LNC_002153                           | F:TAGGGTCAGAATCTGGAGCG<br>R:CAGGAACCTCCACAGGCTCT       |
| LNC_003307                           | F:ACTGAGTCAAGCCTCCCGA<br>R:CGAATGCTTGCAGTCGCT          |
| LNC_000402                           | F:CTGGACCATAACTCAAGATTCC<br>R:CCTTTGCTTTATTTGTCGCC     |
| LNC_000482                           | F:CATCTGGGTTCTTGCTCG<br>R:TGTCTTGGCTTTCTCTGTCTG        |
| LNC_000421                           | F:GAGGAGCAATGGACTGAACA<br>R:ACTGATGGGCAGAGGGAC         |
| LNC_003317                           | F:GGAAGAAGGGACAACGCTG<br>R:ATTCCCCACCCGCTCTTA          |
| LNC_003319                           | F:TCAAACAACAACGGCTGACAT<br>R:CACCTCTGAAAATGGGGACA      |
| LNC_003307 5' RACE GSP               | GATTACGCCAAGCTTATTCATCCCTACCCACCAGCGTGTCTT             |
| LNC_003307 3' RACE GSP<br>(External) | GATTACGCCAAGCTTGCCTTGTGGTCCCCAGTCTAGCAGC               |
| LNC_003307 3' RACE GSP<br>(Internal) | GATTACGCCAAGCTTAGGACACGCTGGTGGGTAGGGATGAA              |
