# Supplementary material for: RNA-Sequencing Characterization of lncRNA and mRNA Functions in Septic Pig Liver Injury
Source: MDPI journal article supplement (doi:10.3390/genes14040945), 2023-04-20
Supplement: s1 [file s1]

**File S1.** Sequence of a transcript of LNC 003307

ACATGGGGAATTACTGAAAGCCAGAGACTCAGGCCAAAGAGTTTCTGCTTCTGGTGGAGAGGAAAGGAGGGCAGTGGACCTCAGGGGACTCAAGAGGGGAGACACAATGGAATCTGGCTTCACCTCCAAGGATGCTTATCTGAGCCATTTTAAACCCTCAGGATTACCTAGAAAAATATTACAACCTTTGGGGGCCAAACACTCCGCAGAAGACCAGATTCTTAGGCATCTTCTGAAATCCTTTTCAAGATATTTTGCCTAGATGGTGTGAAGGGGGACCTCCTGATTGACATCGGCTCTGGCCCCACCATCTATCAGCTCCTCTCTGCTTGTGAGTCTTTCAAGGAGATCATTGCCACCGACTACACGGACCAGAACCTGCAGGAGCTGGAGAAGTGGCTGAAGAAGGAGCCAGGGGCCTTTGACTGGTCCCCAGTGGTGACCTATGTGTGTGAGCTCGAAGGGACAGGTAGAGAACTGGGGTTGGCCTTCTGGCTTTCTGAGGGTACCTGGGTGCCGGTTCATTTTTCAGAACCAGGAATTATCCTTAGAGTCCAAGGTGAAACTCAGAGGAAGCAGTGTGTGTGTGCATAAGATTTTTCTAGCAATTATATATTTAACATATCTATTATTTCATAATGATATATTACAATGATGTAATTCCTTTAACTCACTCTTCTGCCCCTTATGCACTTGCATTTTACACATTTACCTATATATAATCTATATATACTACAACACTAGAATACGTTGTTATTATTTTTGTTTAAACTGTCAGTAATGCTTTCGTTTTTGTGTGTTTTATTTTTAATTGTGGTTAAAAGAATACATATAAAATTTATCATCTTAACTTTTTTTAAGTGTACAGTTTAGTAGTTTTAAATATATTAATATCAGTCTGTAATTTCAACAAATATATATATTTGCATTATGTATTATGTATACATGCATTATGTATGTGTGTGTGTGTATAATCTTCTGTATTTATCCATATATCTGTCTGTCTAATATTC TTCATTCCCTTTCTGCAGATCTAGGCTTCTATCTGGAATCATTTCTCTTCACCTGGAGAAATCTTTTCAGCATTTTCGTTCTTTCTTTTTTATTTTTTGCTTTTCAGGGCCAAACCTGAAGTTCCTGGCTAGGGGTTGAACTGGAGCTGCCGCTGCTGACCTATGCCACAGCCACAGCAACTCGAAATCCCAGCCACATCCATGCCCTACACCACAGCTCATAGCAATGCCAGATCCCTTA ACTCACTGAGCAGGGCCAGGGATCAAGCCCGTGTCCCTCATGGATACTAGCATCGTTCAT TAGCACTGAGCCACAAGGGGAACTCCATCTTTCTTTTTTTTTCTTTTCTTTTCTTTTGTCT TTTTTAGGGCCACACCCGCAGCATATAGAGGTTCCCAGGCTAGGGGTTGAATCGGAAC TGTAGCTGCCGGCTTATGCCGCAGCCACAGCAACTCAGGATCTGAGCCATATCTGTGAC CCACACCACAGCTCAGTGGGATCCTTAACCCACTGAGAGTGGCCAGGGATCGAACCTA CATCCTCATAGACACTATGTGCGAGTCCTTAACCCATGAGCCACAACCTGGAACCCTTCAT ATGCCATTTCAACCTGTAAATGCCTTACTTGGAATTTTATGCTGGCTATTGCCTTCAGAC TGAAGATACGGTCTTCAAAATAAAAGTAATTTCAAATTCTTTTCTTGACAATGTGATTTC ACAGAATGAAATTGATATTAAGTAAAGGAAATTTCCAGGGTTTATAGAATTTCAAGGAAAGCTTATAAAAAAAGTTCTTAGCCATTATCAGACAACACATCTTTCCAAAGTCCGAATCATGTG TCAAGAAGCCTTTTAGAACTTTGTTCTCAATTTCCCTAGCTATTACAAACCTTTCCATCT CCTTCAGAAACGAACCCTTAAAATCTGGCAGGATACTAAAACCATTACTTATCTTAAGC CGGAATCATCGGCTTGTAACAATTGGCTCCAAAGTCACTGTCCCTTCCCAATCACTCAG TTAGACTAAGGAACTGTATTGGGGGCAGTAAAATTCTGCATTCTCACCTTTATCCTCCTA CCAGATCCTGTGGCTTAAACTATTTTCGGGGATGATAGTGATCCCATTCAACTTAGGTCTT TCTTGCACTTTCAAGTGCCTCTATCAACCCACAACCTATTTCCCCTGAGATTATTTCTTC TTTATCTGAAGCTATTTCTTGCGCTGACTGCTGCCAAAGACAATTGGAGCAGACTCCTG TTCTCTGCCTTGGGAGAGTGACACAGACATCTAGACACCACGCATCTTCACAATTCTC CGAAAAGCTGTAAGACACTGGCACCAAATTTCTTGCTCACACTCTTCATTTATCAAGTC AGAAAGTCAAAGACGAAGCTATAACTAACAACCTCAAGCATGAGCCAAGGGAAATCAG CCTTTGCCTTAAGACATCCTAGGAACGGCATTCAATTAACCTCTGGCTCCTGGAACCTGG

AACCTGTTGCCTTGTGGTCCCCAGTCTAGCAGCTTCCATATCATCTGGAAACTTGTTAG  
GCATGCAGACTCTCAGGCTTACCTACAGAATCAGAATCTGCATTTTAATGACATCTGCA  
GGGGACTGCGTGCATTTTACACATTTACCGAGGACCTATGTCTGGAACAGAGTTTCCCA  
ACAGTCATGCCAGGACACGCTGGTGGGTAGGGATGAATTACAGGTGTGCCCTGCAGGT  
ACTCCTTGGCCCTCAGGGCAGCCAGGAGGGGTCTGGGGGAAGCTGGAGCGCCTCCTGG  
CTGCCTCTATGTAAGAGCGGCTCCTCTGCTTACCTCACTGTACTTGACAGTGAGCCTGA  
AGAGGTGGAGCTTCTCTGAAGTAAGTGCTCGTCATACAAAGATCTTTTGTATCTGTTTC  
AAAAGATGGAGTTCTCCTGTGGCGCAGCGGCTTAAGGATCCAGCGTTGTCCCTGCAGC  
AGCTCAGGTGGCGGCTGTGGTGAGGTTTGATCCCTGGCCCAGGAACTTCCATAAGCCA  
AGGGCGTGGCCAGAAAAAATTCATCTATTGCCCTCAATAGACACAGTTTTTGCCAAATT  
TGCTCCATGAGCTAGTGACCTGCCTCTATGCCAAAGCATCTGGGTCTTTTCCTGTCTTAT  
GAAAGACTGACATTCTTTCTCAAAATCAGGATCTTAATGGTCATGATGATTGTCTCAGG  
GACACCTAGACAAAGCTTCTACCTTTTAGTAAGCTGCCTTCTGTCTTGAAAAGGGGCT  
CTCACTGTATTATCTCTTGGGGAGAATGAACAGGACAGCCGAAAAACCTTCAACTGG  
CCATTTCTTTCAAACGTGTAACATTTCTACTTGGGTGTCTCAAAGCATCTCAAGCTCAA  
TGTGCCCAAAATAGAGCTAGGACCTTCCCCAAAAAAAAAAAAAAAAAAAAAAAAAAAA  
AAAA
